# Supplementary material
Source: HighWire-hosted journal article supplement (https://care.diabetesjournals.org/content/suppl/2007/07/10/dc07-0315)

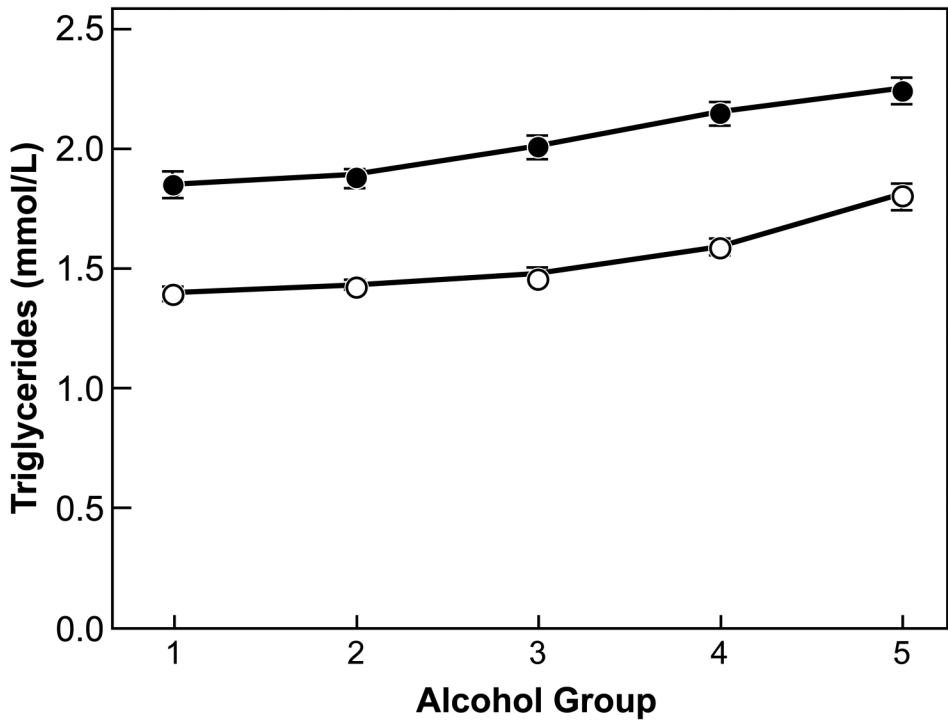

Supplement: DC070315OnlineFigure.pdf [file DC070315OnlineFigure.pdf]
